# Supplementary material
Source: Springer Nature journal article supplement (https://www.springermedizin.de/resource/supplementary/12936_2007_439_MOESM3_ESM.pdf/9547452)

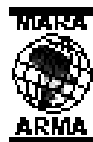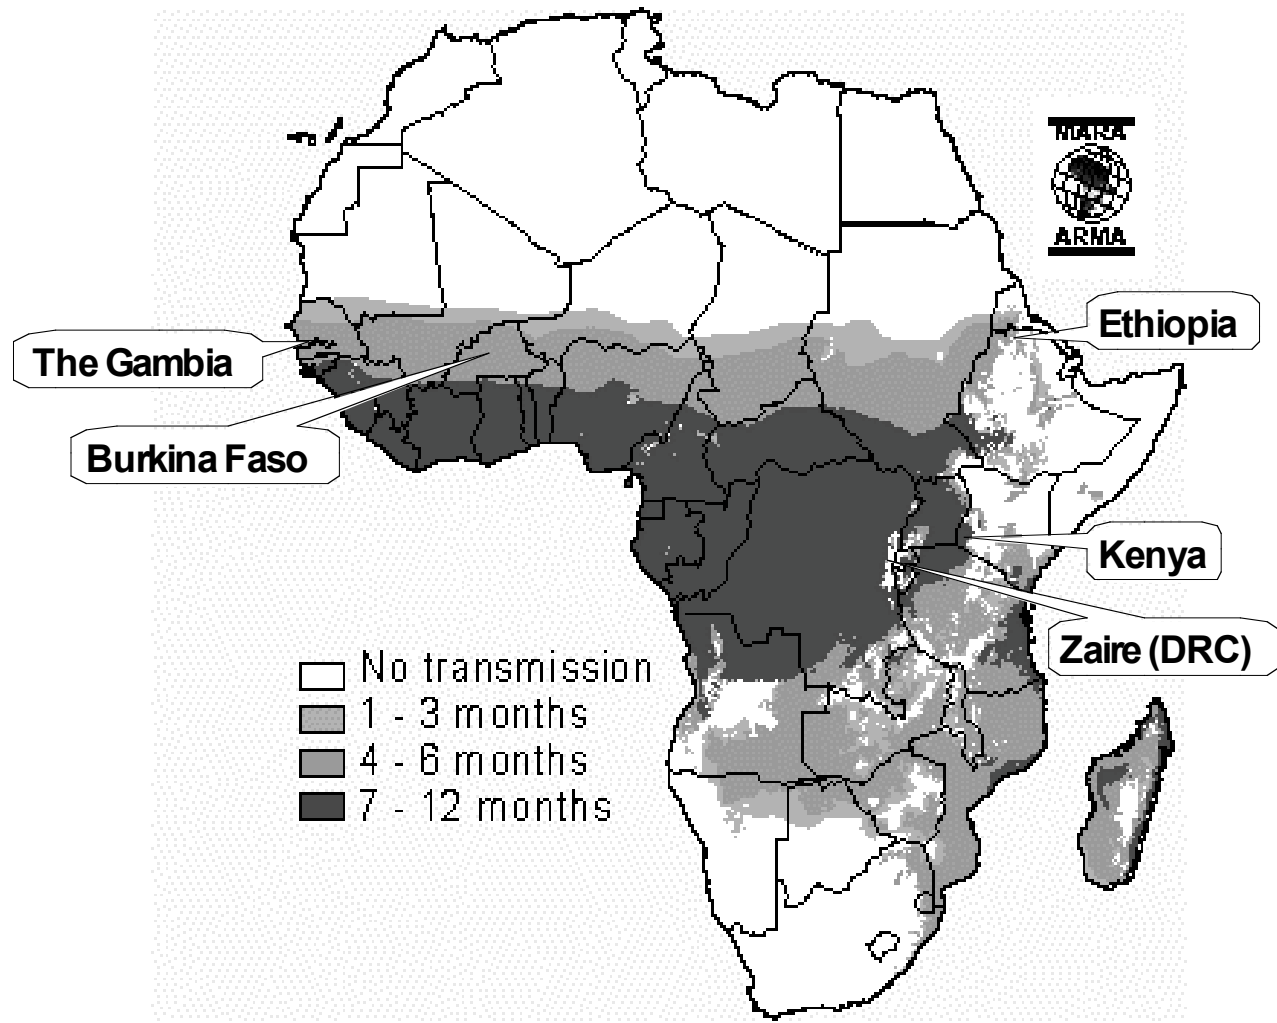

- No transmission
- 1 - 3 months
- 4 - 6 months
- 7 - 12 months

The Gambia

Burkina Faso

Ethiopia

Kenya

Zaire (DRC)

Supplement: MOESM3 [file 9547452]
